# Supplementary material for: Association of Participation in the Maryland Primary Care Program With COVID-19 Outcomes Among Medicare Beneficiaries
Source: PubMed Central journal article supplement (PMC9856987; doi:10.1001/jamanetworkopen.2022.49791), 2023-01-06
Supplement: jamanetwopen-e2249791-s001.pdf [file jamanetwopen-e2249791-s001.pdf]

## Supplementary Online Content

Gruber E, Perman C, Grisham R, Adashi EY, Haft H. Association of participation in the Maryland Primary Care Program with COVID-19 outcomes among Medicare beneficiaries. *JAMA Netw Open*. 2023;6(1):e2249791. doi:10.1001/jamanetworkopen.2022.49791

**eTable 1.** MDPCP and Nonparticipating Populations Before Matching

**eTable 2.** Comparison of 2019 In-Hospital and All-Cause Mortality Using the Same Matching Algorithm as the Main Analysis

**eTable 3.** Demographic and Risk Characteristic Comparison Between the Matched MDPCP Group and Nonparticipating Group, for Asian Beneficiaries Only

**eTable 4.** Comparison of Uptake of COVID-19 Primary Outcomes Between the Matched MDPCP Group and Nonparticipating Group, for Asian Beneficiaries Only

**eTable 5.** COVID-19 Secondary Outcomes in the Matched MDPCP Group and Nonparticipating Group, for Asian Beneficiaries Only

**eTable 6.** Demographic and Risk Characteristic Comparison Between the Matched MDPCP Group and Nonparticipating Group, for Black Beneficiaries Only

**eTable 7.** Comparison of Uptake of COVID-19 Primary Outcomes Between the Matched MDPCP Group and Nonparticipating Group, for Black Beneficiaries Only

**eTable 8.** COVID-19 Secondary Outcomes in the Matched MDPCP Group and Nonparticipating Group, for Black Beneficiaries Only

**eTable 9.** Demographic and Risk Characteristic Comparison Between the Matched MDPCP Group and Nonparticipating Group, for Hispanic Beneficiaries Only

**eTable 10.** Comparison of Uptake of COVID-19 Primary Outcomes Between the Matched MDPCP Group and Nonparticipating Group, for Hispanic Beneficiaries Only

**eTable 11.** COVID-19 Secondary Outcomes in the Matched MDPCP Group and Nonparticipating Group, for Hispanic Beneficiaries Only

**eTable 12.** Demographic and Risk Characteristic Comparison Between the Matched MDPCP Group and Nonparticipating Group, for Other Race and Ethnicity Beneficiaries Only

**eTable 13.** Demographic and Risk Characteristic Comparison Between the Matched MDPCP Group and Nonparticipating Group, for Other Race and Ethnicity Beneficiaries Only

**eTable 14.** COVID-19 Secondary Outcomes in the Matched MDPCP Group and Nonparticipating Group, for Other Race and Ethnicity Beneficiaries Only

**eTable 15.** COVID-19 Secondary Outcomes in the Matched MDPCP Group and Nonparticipating Group, for Other Race and Ethnicity Beneficiaries Only

**eTable 16.** Comparison of Uptake of COVID-19 Primary Outcomes Between the Matched MDPCP Group and Nonparticipating Group, for Unknown Race and Ethnicity Beneficiaries Only

**eTable 17.** COVID-19 Secondary Outcomes in the Matched MDPCP Group and Nonparticipating Group, for Unknown Race and Ethnicity Beneficiaries Only

**eTable 18.** Demographic and Risk Characteristic Comparison Between the Matched MDPCP Group and Nonparticipating Group, for White Beneficiaries Only

**eTable 19.** Comparison of Uptake of COVID-19 Primary Outcomes Between the Matched MDPCP Group and Nonparticipating Group, for White Race Beneficiaries Only

**eTable 20.** COVID-19 Secondary Outcomes in the Matched MDPCP Group and Nonparticipating Group, for White Race Beneficiaries Only

This supplementary material has been provided by the authors to give readers additional information about their work.

**eTable 1.** MDPCP and Nonparticipating Populations Before Matching

|                                                | <b>MDPCP Group<br/>(n = 230,160)</b> | <b>Non-Participating<br/>Group (n = 168,547)</b> |                |
|------------------------------------------------|--------------------------------------|--------------------------------------------------|----------------|
| <b>Measures</b>                                | <b>n (%)</b>                         | <b>n (%)</b>                                     | <b>p-value</b> |
| <b>Age Category</b>                            |                                      |                                                  |                |
| 64 and Younger                                 | 16,151 (7.02)                        | 18,295 (10.85)                                   | <.001          |
| 65 to 69                                       | 26,732 (11.61)                       | 19,416 (11.52)                                   |                |
| 70 to 74                                       | 61,287 (26.63)                       | 41,629 (24.7)                                    |                |
| 75 to 79                                       | 52,141 (22.65)                       | 35,304 (20.95)                                   |                |
| 80 to 84                                       | 35,898 (15.6)                        | 25,035 (14.85)                                   |                |
| 85 and Older                                   | 37,951 (16.49)                       | 28,868 (17.13)                                   |                |
| <b>Gender</b>                                  |                                      |                                                  |                |
| Female                                         | 136,794 (59.43)                      | 100,407 (59.57)                                  | .38            |
| Male                                           | 93,366 (40.57)                       | 68,140 (40.43)                                   |                |
| <b>Race</b>                                    |                                      |                                                  |                |
| Asian                                          | 4,487 (1.95)                         | 6,705 (3.98)                                     | <.001          |
| Black                                          | 45,385 (19.72)                       | 38,854 (23.05)                                   |                |
| Hispanic                                       | 1,905 (0.83)                         | 2,164 (1.28)                                     |                |
| Other                                          | 3,751 (1.63)                         | 3,370 (2)                                        |                |
| Unknown                                        | 5,478 (2.38)                         | 4,324 (2.57)                                     |                |
| White                                          | 169,154 (73.49)                      | 113,130 (67.12)                                  |                |
| <b>Dual Medicare-Medicaid Eligibility Flag</b> |                                      |                                                  |                |
| No                                             | 201,401 (87.5)                       | 136,236 (80.83)                                  | <.001          |
| Yes                                            | 28,759 (12.5)                        | 32,311 (19.17)                                   |                |
| <b>COVID-19 Vulnerability Index Score</b>      |                                      |                                                  |                |
| 1 or 2                                         | 36,824 (16)                          | 39,758 (23.59)                                   | <.001          |
| 3                                              | 70,488 (30.63)                       | 45,872 (27.22)                                   |                |
| 4                                              | 73,173 (31.79)                       | 48,305 (28.66)                                   |                |
| 5                                              | 49,675 (21.58)                       | 34,612 (20.54)                                   |                |
| <b>County</b>                                  |                                      |                                                  |                |
| Allegany                                       | 22,492 (9.77)                        | 14,129 (8.38)                                    | <.001          |
| Anne Arundel                                   | 36,878 (16.02)                       | 19,433 (11.53)                                   |                |
| Baltimore                                      | 18,608 (8.08)                        | 10,773 (6.39)                                    |                |
| Baltimore City                                 | 5,685 (2.47)                         | 1,948 (1.16)                                     |                |
| Calvert                                        | 10,584 (4.6)                         | 4,302 (2.55)                                     |                |
| Carroll                                        | 5,038 (2.19)                         | 4,891 (2.9)                                      |                |
| Charles                                        | 12,620 (5.48)                        | 5,343 (3.17)                                     |                |
| Frederick                                      | 13,798 (5.99)                        | 4,358 (2.59)                                     |                |

|                          |                |                |       |
|--------------------------|----------------|----------------|-------|
| Harford                  | 13,743 (5.97)  | 5,953 (3.53)   |       |
| Howard                   | 27,880 (12.11) | 28,787 (17.08) |       |
| Montgomery               | 21,361 (9.28)  | 35,087 (20.82) |       |
| Other                    | 16,037 (6.97)  | 21,467 (12.74) |       |
| Prince Georges           | 6,760 (2.94)   | 2,080 (1.23)   |       |
| Washington               | 8,527 (3.7)    | 5,189 (3.08)   |       |
| Wicomico                 | 5,440 (2.36)   | 2,978 (1.77)   |       |
| Worcester                | 4,709 (2.05)   | 1,829 (1.09)   |       |
| <b>Average HCC Score</b> |                |                |       |
|                          | 1.3751         | 1.4248         | <.001 |
| <b>Average ADI Score</b> |                |                |       |
|                          | 31.41          | 31.58          | .02   |

**eTable 2.** Comparison of 2019 In-Hospital and All-Cause Mortality Using the Same Matching Algorithm as the Main Analysis

|                                                | <b>MDPCP Group<br/>(n = 195,013)</b> | <b>Non-Participating<br/>Group (n = 74,980)</b> |                |
|------------------------------------------------|--------------------------------------|-------------------------------------------------|----------------|
| <b>Measures</b>                                | <b>n (%)</b>                         | <b>n (%)</b>                                    | <b>p-value</b> |
| <b>Age Category</b>                            |                                      |                                                 |                |
| 64 and Younger                                 | 15,349 (7.87)                        | 5,896 (7.86)                                    | >.99           |
| 65 to 69                                       | 26,922 (13.81)                       | 10,353 (13.81)                                  |                |
| 70 to 74                                       | 52,417 (26.88)                       | 20,157 (26.88)                                  |                |
| 75 to 79                                       | 41,419 (21.24)                       | 15,918 (21.23)                                  |                |
| 80 to 84                                       | 27,747 (14.23)                       | 10,667 (14.23)                                  |                |
| 85 and Older                                   | 31,159 (15.98)                       | 11,989 (15.99)                                  |                |
| <b>Gender</b>                                  |                                      |                                                 |                |
| Female                                         | 117,325 (60.16)                      | 45,109 (60.16)                                  | >.99           |
| Male                                           | 77,688 (39.84)                       | 29,871 (39.84)                                  |                |
| <b>Race</b>                                    |                                      |                                                 |                |
| Asian                                          | 2,791 (1.43)                         | 1,071 (1.43)                                    | >.99           |
| Black                                          | 39,263 (20.13)                       | 15,084 (20.12)                                  |                |
| Hispanic                                       | 1,133 (0.58)                         | 438 (0.58)                                      |                |
| Other                                          | 1,950 (1)                            | 747 (1)                                         |                |
| Unknown                                        | 2,877 (1.48)                         | 1,108 (1.48)                                    |                |
| White                                          | 146,999 (75.38)                      | 56,532 (75.4)                                   |                |
| <b>Dual Medicare-Medicaid Eligibility Flag</b> |                                      |                                                 |                |
| No                                             | 173,533 (88.99)                      | 66,727 (88.99)                                  | .95            |
| Yes                                            | 21,480 (11.01)                       | 8,253 (11.01)                                   |                |
| <b>COVID-19 Vulnerability Index Score</b>      |                                      |                                                 |                |
| 1 or 2                                         | 35,428 (18.17)                       | 13,624 (18.17)                                  | >.99           |
| 3                                              | 55,482 (28.45)                       | 21,326 (28.44)                                  |                |
| 4                                              | 60,515 (31.03)                       | 23,275 (31.04)                                  |                |
| 5                                              | 43,588 (22.35)                       | 16,755 (22.35)                                  |                |
| <b>County</b>                                  |                                      |                                                 |                |
| Allegany                                       | 3,306 (1.7)                          | 1,266 (1.69)                                    | >.99           |
| Anne Arundel                                   | 17,355 (8.9)                         | 6,677 (8.91)                                    |                |
| Baltimore                                      | 29,131 (14.94)                       | 11,201 (14.94)                                  |                |
| Baltimore City                                 | 19,001 (9.74)                        | 7,302 (9.74)                                    |                |
| Calvert                                        | 4,597 (2.36)                         | 1,770 (2.36)                                    |                |
| Carroll                                        | 8,864 (4.55)                         | 3,408 (4.55)                                    |                |

|                              |                |                |     |
|------------------------------|----------------|----------------|-----|
| Charles                      | 2,975 (1.53)   | 1,147 (1.53)   |     |
| Frederick                    | 9,960 (5.11)   | 3,834 (5.11)   |     |
| Harford                      | 9,725 (4.99)   | 3,740 (4.99)   |     |
| Howard                       | 9,018 (4.62)   | 3,469 (4.63)   |     |
| Montgomery                   | 30,187 (15.48) | 11,600 (15.47) |     |
| Other                        | 18,516 (9.49)  | 7,118 (9.49)   |     |
| Prince Georges               | 16,241 (8.33)  | 6,247 (8.33)   |     |
| Washington                   | 7,176 (3.68)   | 2,755 (3.67)   |     |
| Wicomico                     | 5,007 (2.57)   | 1,923 (2.56)   |     |
| Worcester                    | 3,954 (2.03)   | 1,523 (2.03)   |     |
| <b>Hospital Death Count</b>  |                |                | .21 |
|                              | 1,890 (0.97)   | 687 (0.92)     |     |
| <b>All-Cause Death Count</b> |                |                | .90 |
|                              | 6,832 (3.5)    | 2,634 (3.51)   |     |

**eTable 3.** Demographic and Risk Characteristic Comparison Between the Matched MDPCP Group and Nonparticipating Group, for Asian Beneficiaries Only

|                                                | <b>MDPCP Group<br/>(n = 2,544)</b> | <b>Non-Participating<br/>Group (n = 458)</b> |                |
|------------------------------------------------|------------------------------------|----------------------------------------------|----------------|
| <b>Measures</b>                                | <b>n (%)</b>                       | <b>n (%)</b>                                 | <b>p-value</b> |
| <b>Age Category</b>                            |                                    |                                              |                |
| 64 and Younger                                 | 44 (1.73)                          | <11 (<2.4)                                   | >.99           |
| 65 to 69                                       | 241 (9.47)                         | 44 (9.61)                                    |                |
| 70 to 74                                       | 730 (28.69)                        | 131 (28.6)                                   |                |
| 75 to 79                                       | 583 (22.92)                        | 105 (22.93)                                  |                |
| 80 to 84                                       | 405 (15.92)                        | 73 (15.94)                                   |                |
| 85 and Older                                   | 541 (21.27)                        | >94 (>20.52)                                 |                |
| <b>Gender</b>                                  |                                    |                                              |                |
| Female                                         | 1,691 (66.47)                      | 306 (66.81)                                  | .89            |
| Male                                           | 853 (33.53)                        | 152 (33.19)                                  |                |
| <b>Dual Medicare-Medicaid Eligibility Flag</b> |                                    |                                              |                |
| No                                             | 1,259 (49.49)                      | 229 (50)                                     | .84            |
| Yes                                            | 1,285 (50.51)                      | 229 (50)                                     |                |
| <b>COVID-19 Vulnerability Index Score</b>      |                                    |                                              |                |
| 1 or 2                                         | 168 (6.6)                          | 31 (6.77)                                    | >.99           |
| 3                                              | 914 (35.93)                        | 164 (35.81)                                  |                |
| 4                                              | 919 (36.12)                        | 164 (35.81)                                  |                |
| 5                                              | 543 (21.34)                        | 99 (21.62)                                   |                |
| <b>County</b>                                  |                                    |                                              |                |
| Anne Arundel                                   | 33 (1.3)                           | <11 (<2.4)                                   | >.990          |
| Baltimore                                      | 202 (7.94)                         | 36 (7.86)                                    |                |
| Baltimore City                                 | <11 (0.31)                         | <11 (<2.4)                                   |                |
| Howard                                         | 290 (11.4)                         | 53 (11.57)                                   |                |
| Montgomery                                     | 1,850 (72.72)                      | 332 (72.49)                                  |                |
| Other                                          | <11 (0.08)                         | 0                                            |                |
| Prince Georges                                 | 159 (6.25)                         | >15 (>3.28)                                  |                |
| <b>Average HCC Score</b>                       |                                    |                                              |                |
|                                                | 1.3071                             | 1.2231                                       | .19            |
| <b>Average ADI Score</b>                       |                                    |                                              |                |
|                                                | 18.70                              | 19.11                                        | .57            |

**eTable 4.** Comparison of Uptake of COVID-19 Primary Outcomes Between the Matched MDPCP Group and Nonparticipating Group, for Asian Beneficiaries Only

|                                                                          | <b>MDPCP Group (n = 2,544)</b> | <b>Non-Participating Group (n = 458)</b> |                |
|--------------------------------------------------------------------------|--------------------------------|------------------------------------------|----------------|
| <b>Measures</b>                                                          | <b>n (%)</b>                   | <b>n (%)</b>                             | <b>p-value</b> |
| <b>Vaccine Status</b>                                                    |                                |                                          |                |
| NOT vaccinated                                                           | 301 (11.83)                    | 68 (14.85)                               | .02            |
| fully vaccinated with booster                                            | 1,762 (69.26)                  | 284 (62.01)                              |                |
| fully vaccinated without booster                                         | 408 (16.04)                    | 87 (19)                                  |                |
| partially vaccinated                                                     | 73 (2.87)                      | 19 (4.15)                                |                |
| <b>Booster Vaccine Status</b>                                            |                                |                                          |                |
| No                                                                       | 782 (30.74)                    | 174 (37.99)                              | .002           |
| Yes                                                                      | 1,762 (69.26)                  | 284 (62.01)                              |                |
| <b>COVID-19 positive beneficiaries with monoclonal antibody infusion</b> | <11 (<8.46)                    | 0 (0)                                    | .44            |
| <b>COVID-19 positive beneficiaries with telehealth service claims</b>    | 247 (63.85)                    | 47 (66.67)                               | .39            |

**eTable 5.** COVID-19 Secondary Outcomes in the Matched MDPCP Group and Nonparticipating Group, for Asian Beneficiaries Only

|                                                         | <b>MDPCP Group<br/>(n = 2,544)</b> | <b>Non-Participating<br/>Group (n = 458)</b> |                |
|---------------------------------------------------------|------------------------------------|----------------------------------------------|----------------|
| <b>Measures</b>                                         | <b>n (%)</b>                       | <b>n (%)</b>                                 | <b>p-value</b> |
| COVID-19 Positive Beneficiaries                         | 130 (5.11)                         | 15 (3.28)                                    | .09            |
| Beneficiaries with COVID-19 inpatient claims            | 43 (1.69)                          | <11 (1.53)                                   | .80            |
| Beneficiaries with COVID-19 emergency department claims | 25 (0.98)                          | <11 (0.87)                                   | .83            |
| COVID-19 Death Count                                    | 15 (0.59)                          | <11 (0.44)                                   | .69            |
| Average COVID-19 inpatient admission length of stay     | 9.58                               | 7.18                                         | .33            |



**eTable 6.** Demographic and Risk Characteristic Comparison Between the Matched MDPCP Group and Nonparticipating Group, for Black Beneficiaries Only

|                                                | <b>MDPCP Group<br/>(n = 37,368)</b> | <b>Non-Participating<br/>Group (n = 6,680)</b> |                |
|------------------------------------------------|-------------------------------------|------------------------------------------------|----------------|
| <b>Measures</b>                                | <b>n (%)</b>                        | <b>n (%)</b>                                   | <b>p-value</b> |
| <b>Age Category</b>                            |                                     |                                                | >.99           |
| 64 and Younger                                 | 4,827 (12.92)                       | 860 (12.87)                                    |                |
| 65 to 69                                       | 4,611 (12.34)                       | 828 (12.4)                                     |                |
| 70 to 74                                       | 10,557 (28.25)                      | 1,885 (28.22)                                  |                |
| 75 to 79                                       | 7,491 (20.05)                       | 1,339 (20.04)                                  |                |
| 80 to 84                                       | 4,976 (13.32)                       | 889 (13.31)                                    |                |
| 85 and Older                                   | 4,906 (13.13)                       | 879 (13.16)                                    |                |
| <b>Gender</b>                                  |                                     |                                                | .96            |
| Female                                         | 25,498 (68.23)                      | 4,560 (68.26)                                  |                |
| Male                                           | 11,870 (31.77)                      | 2,120 (31.74)                                  |                |
| <b>Dual Medicare-Medicaid Eligibility Flag</b> |                                     |                                                | .92            |
| No                                             | 29,779 (79.69)                      | 5,320 (79.64)                                  |                |
| Yes                                            | 7,589 (20.31)                       | 1,360 (20.36)                                  |                |
| <b>COVID-19 Vulnerability Index Score</b>      |                                     |                                                | >.99           |
| 1 or 2                                         | 5,862 (15.69)                       | 1,047 (15.67)                                  |                |
| 3                                              | 10,275 (27.5)                       | 1,833 (27.44)                                  |                |
| 4                                              | 12,392 (33.16)                      | 2,217 (33.19)                                  |                |
| 5                                              | 8,839 (23.65)                       | 1,583 (23.7)                                   |                |
| <b>County</b>                                  |                                     |                                                | >.99           |
| Anne Arundel                                   | 2,288 (6.12)                        | 410 (6.14)                                     |                |
| Baltimore                                      | 7,214 (19.31)                       | 1,290 (19.31)                                  |                |
| Baltimore City                                 | 10,036 (26.86)                      | 1,794 (26.86)                                  |                |
| Calvert                                        | 105 (0.28)                          | 18 (0.27)                                      |                |
| Charles                                        | 1,364 (3.65)                        | 244 (3.65)                                     |                |
| Frederick                                      | 68 (0.18)                           | 12 (0.18)                                      |                |
| Harford                                        | 186 (0.5)                           | 33 (0.49)                                      |                |
| Howard                                         | 1,183 (3.17)                        | 211 (3.16)                                     |                |
| Montgomery                                     | 3,151 (8.43)                        | 563 (8.43)                                     |                |
| Other                                          | 2,057 (5.5)                         | 367 (5.49)                                     |                |
| Prince Georges                                 | 9,394 (25.14)                       | 1,680 (25.15)                                  |                |
| Saint Marys                                    | 61 (0.16)                           | 11 (0.16)                                      |                |

|                          |            |             |     |
|--------------------------|------------|-------------|-----|
| Washington               | 54 (0.14)  | <11 (<0.16) |     |
| Wicomico                 | 207 (0.55) | >36 (>0.54) |     |
| <b>Average HCC Score</b> |            |             |     |
|                          | 1.4462     | 1.4651      | .33 |
| <b>Average ADI Score</b> |            |             |     |
|                          | 42.46      | 42.72       | .44 |

**eTable 7.** Comparison of Uptake of COVID-19 Primary Outcomes Between the Matched MDPCP Group and Nonparticipating Group, for Black Beneficiaries Only

|                                                                          | <b>MDPCP Group (n = 37,368)</b> | <b>Non-Participating Group (n = 6,680)</b> |                |
|--------------------------------------------------------------------------|---------------------------------|--------------------------------------------|----------------|
| <b>Measures</b>                                                          | <b>n (%)</b>                    | <b>n (%)</b>                               | <b>p-value</b> |
| <b>Vaccine Status</b>                                                    |                                 |                                            |                |
| NOT vaccinated                                                           | 5,296 (14.17)                   | 1,328 (19.88)                              | <.001          |
| fully vaccinated with booster                                            | 23,764 (63.59)                  | 3,729 (55.82)                              |                |
| fully vaccinated without booster                                         | 7,180 (19.21)                   | 1,336 (20)                                 |                |
| partially vaccinated                                                     | 1,128 (3.02)                    | 287 (4.3)                                  |                |
| <b>Booster Vaccine Status</b>                                            |                                 |                                            |                |
| No                                                                       | 13,604 (36.41)                  | 2,951 (44.18)                              | <.001          |
| Yes                                                                      | 23,764 (63.59)                  | 3,729 (55.82)                              |                |
| <b>COVID-19 positive beneficiaries with monoclonal antibody infusion</b> | 153 (5.18)                      | 12 (2.28)                                  | .004           |
| <b>COVID-19 positive beneficiaries with telehealth service claims</b>    | 4,885 (66.01)                   | 857 (54.84)                                | <.001          |

**eTable 8.** COVID-19 Secondary Outcomes in the Matched MDPCP Group and Nonparticipating Group, for Black Beneficiaries Only

|                                                         | <b>MDPCP Group<br/>(n = 37,368)</b> | <b>Non-Participating<br/>Group (n = 6,680)</b> |                |
|---------------------------------------------------------|-------------------------------------|------------------------------------------------|----------------|
| <b>Measures</b>                                         | <b>n (%)</b>                        | <b>n (%)</b>                                   | <b>p-value</b> |
| COVID-19 Positive Beneficiaries                         | 2,954 (7.91)                        | 527 (7.89)                                     | .96            |
| Beneficiaries with COVID-19 inpatient claims            | 1,022 (2.73)                        | 184 (2.75)                                     | .93            |
| Beneficiaries with COVID-19 emergency department claims | 588 (1.57)                          | 92 (1.38)                                      | .23            |
| COVID-19 Death Count                                    | 290 (0.78)                          | 60 (0.9)                                       | .30            |
| Average COVID-19 inpatient admission length of stay     | 9.84                                | 10.22                                          | .60            |

**eTable 9. Demographic and Risk Characteristic Comparison Between the Matched MDPCP Group and Nonparticipating Group, for Hispanic Beneficiaries Only**

|                                                | <b>MDPCP Group<br/>(n = 840)</b> | <b>Non-Participating<br/>Group (n = 150)</b> |                |
|------------------------------------------------|----------------------------------|----------------------------------------------|----------------|
| <b>Measures</b>                                | <b>n (%)</b>                     | <b>n (%)</b>                                 | <b>p-value</b> |
| <b>Age Category</b>                            |                                  |                                              | >.99           |
| 64 and Younger                                 | 74 (8.81)                        | 13 (8.67)                                    |                |
| 65 to 69                                       | 79 (9.4)                         | 14 (9.33)                                    |                |
| 70 to 74                                       | 248 (29.52)                      | 44 (29.33)                                   |                |
| 75 to 79                                       | 149 (17.74)                      | 27 (18)                                      |                |
| 80 to 84                                       | 137 (16.31)                      | 24 (16)                                      |                |
| 85 and Older                                   | 153 (18.21)                      | 28 (18.67)                                   |                |
| <b>Gender</b>                                  |                                  |                                              | .79            |
| Female                                         | 664 (79.05)                      | 120 (80)                                     |                |
| Male                                           | 176 (20.95)                      | 30 (20)                                      |                |
| <b>Dual Medicare-Medicaid Eligibility Flag</b> |                                  |                                              | .86            |
| No                                             | 230 (27.38)                      | 40 (26.67)                                   |                |
| Yes                                            | 610 (72.62)                      | 110 (73.33)                                  |                |
| <b>COVID-19 Vulnerability Index Score</b>      |                                  |                                              | >.99           |
| 1 or 2                                         | 102 (12.14)                      | 18 (12)                                      |                |
| 3                                              | 329 (39.17)                      | 59 (39.33)                                   |                |
| 4                                              | 264 (31.43)                      | 46 (30.67)                                   |                |
| 5                                              | 145 (17.26)                      | 27 (18)                                      |                |
| <b>County</b>                                  |                                  |                                              | >.99           |
| Montgomery                                     | 728 (86.67)                      | 130 (86.67)                                  |                |
| Prince Georges                                 | 112 (13.33)                      | 20 (13.33)                                   |                |
| <b>Average HCC Score</b>                       |                                  |                                              | .39            |
|                                                | 1.2746                           | 1.1941                                       |                |
| <b>Average ADI Score</b>                       |                                  |                                              | .43            |
|                                                | 23.01                            | 22.10                                        |                |

**eTable 10.** Comparison of Uptake of COVID-19 Primary Outcomes Between the Matched MDPCP Group and Nonparticipating Group, for Hispanic Beneficiaries Only

|                                                                          | <b>MDPCP Group (n = 840)</b> | <b>Non-Participating Group (n = 150)</b> |                |
|--------------------------------------------------------------------------|------------------------------|------------------------------------------|----------------|
| <b>Measures</b>                                                          | <b>n (%)</b>                 | <b>n (%)</b>                             | <b>p-value</b> |
| <b>Vaccine Status</b>                                                    |                              |                                          |                |
| NOT vaccinated                                                           | 146 (17.38)                  | >27 (>18.01)                             | .43            |
| fully vaccinated with booster                                            | 471 (56.07)                  | 74 (49.33)                               |                |
| fully vaccinated without booster                                         | 198 (23.57)                  | 38 (25.33)                               |                |
| partially vaccinated                                                     | 25 (2.98)                    | <11 (<7.33)                              |                |
| <b>Booster Vaccine Status</b>                                            |                              |                                          |                |
| No                                                                       | 369 (43.93)                  | 76 (50.67)                               | .13            |
| Yes                                                                      | 471 (56.07)                  | 74 (49.33)                               |                |
| <b>COVID-19 positive beneficiaries with monoclonal antibody infusion</b> | <11 (3.51)                   | 0                                        | .27            |
| <b>COVID-19 positive beneficiaries with telehealth service claims</b>    | 266 (80.7)                   | 111 (73.53)                              | .78            |

**eTable 11.** COVID-19 Secondary Outcomes in the Matched MDPCP Group and Nonparticipating Group, for Hispanic Beneficiaries Only

|                                                         | <b>MDPCP Group<br/>(n = 840)</b> | <b>Non-Participating<br/>Group (n = 150)</b> |                |
|---------------------------------------------------------|----------------------------------|----------------------------------------------|----------------|
| <b>Measures</b>                                         | <b>n (%)</b>                     | <b>n (%)</b>                                 | <b>p-value</b> |
| COVID-19 Positive Beneficiaries                         | 114 (13.57)                      | 34 (22.67)                                   | .004           |
| Beneficiaries with COVID-19 inpatient claims            | 35 (4.17)                        | 12 (8)                                       | .04            |
| Beneficiaries with COVID-19 emergency department claims | 23 (2.74)                        | <11 (<7.33)                                  | .31            |
| COVID-19 Death Count                                    | 13 (1.55)                        | <11 (<7.33)                                  | .69            |
| Average COVID-19 inpatient admission length of stay     | 11.42                            | 14.62                                        | .49            |

**eTable 12.** Demographic and Risk Characteristic Comparison Between the Matched MDPCP Group and Nonparticipating Group, for Other Race and Ethnicity Beneficiaries Only

|                                                | <b>MDPCP Group<br/>(n = 1,664)</b> | <b>Non-Participating<br/>Group (n = 300)</b> |                |
|------------------------------------------------|------------------------------------|----------------------------------------------|----------------|
| <b>Measures</b>                                | <b>n (%)</b>                       | <b>n (%)</b>                                 | <b>p-value</b> |
| <b>Age Category</b>                            |                                    |                                              |                |
| 64 and Younger                                 | 0                                  | 0                                            | >.99           |
| 65 to 69                                       | 59 (3.55)                          | 11 (3.67)                                    |                |
| 70 to 74                                       | 488 (29.33)                        | 86 (28.67)                                   |                |
| 75 to 79                                       | 478 (28.73)                        | 86 (28.67)                                   |                |
| 80 to 84                                       | 401 (24.1)                         | 73 (24.33)                                   |                |
| 85 and Older                                   | 238 (14.3)                         | 44 (14.67)                                   |                |
| <b>Gender</b>                                  |                                    |                                              |                |
| Female                                         | 1,011 (60.76)                      | 182 (60.67)                                  | .98            |
| Male                                           | 653 (39.24)                        | 118 (39.33)                                  |                |
| <b>Dual Medicare-Medicaid Eligibility Flag</b> |                                    |                                              |                |
| No                                             | 1,590 (95.55)                      | 287 (95.67)                                  | .93            |
| Yes                                            | 74 (4.45)                          | 13 (4.33)                                    |                |
| <b>COVID-19 Vulnerability Index Score</b>      |                                    |                                              |                |
| 1 or 2                                         | 0                                  | 0                                            | .99            |
| 3                                              | 586 (35.22)                        | 105 (35)                                     |                |
| 4                                              | 778 (46.75)                        | 140 (46.67)                                  |                |
| 5                                              | 300 (18.03)                        | 55 (18.33)                                   |                |
| <b>County</b>                                  |                                    |                                              |                |
| Anne Arundel                                   | 32 (1.92)                          | <11 (<3.67)                                  |                |
| Baltimore                                      | 140 (8.41)                         | 26 (8.67)                                    |                |
| Howard                                         | 148 (8.89)                         | 26 (8.67)                                    |                |
| Montgomery                                     | 1,162 (69.83)                      | 209 (69.67)                                  |                |
| Prince Georges                                 | 182 (10.94)                        | >28 (>9.32)                                  |                |
| <b>Average HCC Score</b>                       |                                    |                                              |                |
|                                                | 1.1269                             | 1.0415                                       | .17            |
| <b>Average ADI Score</b>                       |                                    |                                              |                |
|                                                | 17.26                              | 15.72                                        | .06            |



**eTable 13.** Comparison of Uptake of COVID-19 Primary Outcomes Between the Matched MDPCP Group and Nonparticipating Group, for Other Race and Ethnicity Beneficiaries Only

|                                                                          | <b>MDPCP Group (n = 1,664)</b> | <b>Non-Participating Group (n = 300)</b> |                |
|--------------------------------------------------------------------------|--------------------------------|------------------------------------------|----------------|
| <b>Measures</b>                                                          | <b>n (%)</b>                   | <b>n (%)</b>                             | <b>p-value</b> |
| <b>Vaccine Status</b>                                                    |                                |                                          |                |
| NOT vaccinated                                                           | 109 (6.55)                     | 31 (10.33)                               | .03            |
| fully vaccinated with booster                                            | 1,274 (76.56)                  | 224 (74.67)                              |                |
| fully vaccinated without booster                                         | 222 (13.34)                    | 30 (10)                                  |                |
| partially vaccinated                                                     | 59 (3.55)                      | 15 (5)                                   |                |
| <b>Booster Vaccine Status</b>                                            |                                |                                          |                |
| No                                                                       | 390 (23.44)                    | 76 (25.33)                               | .48            |
| Yes                                                                      | 1,274 (76.56)                  | 224 (74.67)                              |                |
| <b>COVID-19 positive beneficiaries with monoclonal antibody infusion</b> | <11 (<16.92)                   | 0 (0)                                    | .35            |
| <b>COVID-19 positive beneficiaries with telehealth service claims</b>    | 119 (69.23)                    | 52 (66.67)                               | .88            |

**eTable 14.** COVID-19 Secondary Outcomes in the Matched MDPCP Group and Nonparticipating Group, for Other Race and Ethnicity Beneficiaries Only

|                                                         | <b>MDPCP Group<br/>(n = 1,664)</b> | <b>Non-Participating<br/>Group (n = 300)</b> |                |
|---------------------------------------------------------|------------------------------------|----------------------------------------------|----------------|
| <b>Measures</b>                                         | <b>n (%)</b>                       | <b>n (%)</b>                                 | <b>p-value</b> |
| COVID-19 Positive Beneficiaries                         | 65 (3.91)                          | 18 (6)                                       | .10            |
| Beneficiaries with COVID-19 inpatient claims            | 20 (1.2)                           | <11 (2)                                      | .27            |
| Beneficiaries with COVID-19 emergency department claims | <11 (0.42)                         | 0 (0)                                        | .26            |
| COVID-19 Death Count                                    | <11 (0.18)                         | 0 (0)                                        | .46            |
| Average COVID-19 inpatient admission length of stay     | 10.21                              | 12.83                                        | .44            |

**eTable 15.** Demographic and Risk Characteristic Comparison Between the Matched MDPCP Group and Nonparticipating Group, for Unknown Race and Ethnicity Beneficiaries Only

|                                                | <b>MDPCP Group<br/>(n = 2,536)</b> | <b>Non-Participating<br/>Group (n = 454)</b> |                |
|------------------------------------------------|------------------------------------|----------------------------------------------|----------------|
| <b>Measures</b>                                | <b>n (%)</b>                       | <b>n (%)</b>                                 | <b>p-value</b> |
| <b>Age Category</b>                            |                                    |                                              | <b>&gt;.99</b> |
| 64 and Younger                                 | 26 (1.03)                          | <11 (<2.42)                                  |                |
| 65 to 69                                       | 320 (12.62)                        | 58 (12.78)                                   |                |
| 70 to 74                                       | 1,880 (74.13)                      | 335 (73.79)                                  |                |
| 75 to 79                                       | 204 (8.04)                         | 37 (8.15)                                    |                |
| 80 to 84                                       | 58 (2.29)                          | >2 (>0.44)                                   |                |
| 85 and Older                                   | 48 (1.89)                          | <11 (<2.42)                                  |                |
| <b>Gender</b>                                  |                                    |                                              | <b>.88</b>     |
| Female                                         | 998 (39.35)                        | 177 (38.99)                                  |                |
| Male                                           | 1,538 (60.65)                      | 277 (61.01)                                  |                |
| <b>Dual Medicare-Medicaid Eligibility Flag</b> |                                    |                                              | <b>.94</b>     |
| No                                             | 2,215 (87.34)                      | 396 (87.22)                                  |                |
| Yes                                            | 321 (12.66)                        | 58 (12.78)                                   |                |
| <b>COVID-19 Vulnerability Index Score</b>      |                                    |                                              | <b>.98</b>     |
| 1 or 2                                         | 397 (15.65)                        | >70 (>15.42)                                 |                |
| 3                                              | 1,568 (61.83)                      | 278 (61.23)                                  |                |
| 4                                              | 528 (20.82)                        | 95 (20.93)                                   |                |
| 5                                              | 43 (1.7)                           | <11 (<2.42)                                  |                |
| <b>County</b>                                  |                                    |                                              | <b>&gt;.99</b> |
| Anne Arundel                                   | 240 (9.46)                         | 43 (9.47)                                    |                |
| Baltimore                                      | 469 (18.49)                        | 83 (18.28)                                   |                |
| Baltimore City                                 | 114 (4.5)                          | 20 (4.41)                                    |                |
| Frederick                                      | 71 (2.8)                           | 13 (2.86)                                    |                |
| Howard                                         | 217 (8.56)                         | 38 (8.37)                                    |                |
| Montgomery                                     | 996 (39.27)                        | 179 (39.43)                                  |                |
| Other                                          | 319 (12.58)                        | 58 (12.78)                                   |                |
| Prince Georges                                 | 110 (4.34)                         | 20 (4.41)                                    |                |
| <b>Average HCC Score</b>                       |                                    |                                              | <b>.53</b>     |
|                                                | 0.9164                             | 0.8891                                       |                |
| <b>Average ADI Score</b>                       |                                    |                                              | <b>.05</b>     |

|  |       |       |  |
|--|-------|-------|--|
|  | 20.26 | 18.64 |  |
|--|-------|-------|--|

**eTable 16.** Comparison of Uptake of COVID-19 Primary Outcomes Between the Matched MDPCP Group and Nonparticipating Group, for Unknown Race and Ethnicity Beneficiaries Only

|                                                                          | <b>MDPCP Group (n = 2,536)</b> | <b>Non-Participating Group (n = 454)</b> |                |
|--------------------------------------------------------------------------|--------------------------------|------------------------------------------|----------------|
| <b>Measures</b>                                                          | <b>n (%)</b>                   | <b>n (%)</b>                             | <b>p-value</b> |
| <b>Vaccine Status</b>                                                    |                                |                                          |                |
| NOT vaccinated                                                           | 188 (7.41)                     | 50 (11.01)                               | .04            |
| fully vaccinated with booster                                            | 1,909 (75.28)                  | 318 (70.04)                              |                |
| fully vaccinated without booster                                         | 368 (14.51)                    | 72 (15.86)                               |                |
| partially vaccinated                                                     | 71 (2.8)                       | 14 (3.08)                                |                |
| <b>Booster Vaccine Status</b>                                            |                                |                                          |                |
| No                                                                       | 627 (24.72)                    | 136 (29.96)                              | .02            |
| Yes                                                                      | 1,909 (75.28)                  | 318 (70.04)                              |                |
| <b>COVID-19 positive beneficiaries with monoclonal antibody infusion</b> | 13 (10)                        | <11 (47.82)                              | .11            |
| <b>COVID-19 positive beneficiaries with telehealth service claims</b>    | 165 (67.69)                    | 18 (43.48)                               | .06            |

**eTable 17.** COVID-19 Secondary Outcomes in the Matched MDPCP Group and Nonparticipating Group, for Unknown Race and Ethnicity Beneficiaries Only

|                                                         | <b>MDPCP Group<br/>(n = 2,536)</b> | <b>Non-Participating<br/>Group (n = 454)</b> |                |
|---------------------------------------------------------|------------------------------------|----------------------------------------------|----------------|
| <b>Measures</b>                                         | <b>n (%)</b>                       | <b>n (%)</b>                                 | <b>p-value</b> |
| COVID-19 Positive Beneficiaries                         | 130 (5.13)                         | 23 (5.07)                                    | .96            |
| Beneficiaries with COVID-19 inpatient claims            | 17 (0.67)                          | <11 (<2.42)                                  | .98            |
| Beneficiaries with COVID-19 emergency department claims | 11 (0.43)                          | <11 (<2.42)                                  | .51            |
| COVID-19 Death Count                                    | <11 (<0.43)                        | 0 (0)                                        | .46            |
| Average COVID-19 inpatient admission length of stay     | 9.26                               | 9.33                                         | .99            |

**eTable 18.** Demographic and Risk Characteristic Comparison Between the Matched MDPCP Group and Nonparticipating Group, for White Beneficiaries Only

|                                                | <b>MDPCP Group<br/>(n = 163,194)</b> | <b>Non-Participating<br/>Group (n = 29,161)</b> |                |
|------------------------------------------------|--------------------------------------|-------------------------------------------------|----------------|
| <b>Measures</b>                                | <b>n (%)</b>                         | <b>n (%)</b>                                    | <b>p-value</b> |
| <b>Age Category</b>                            |                                      |                                                 |                |
| 64 and Younger                                 | 8,436 (5.17)                         | 1,503 (5.15)                                    | >.99           |
| 65 to 69                                       | 17,657 (10.82)                       | 3,156 (10.82)                                   |                |
| 70 to 74                                       | 42,404 (25.98)                       | 7,579 (25.99)                                   |                |
| 75 to 79                                       | 38,817 (23.79)                       | 6,940 (23.8)                                    |                |
| 80 to 84                                       | 26,527 (16.25)                       | 4,738 (16.25)                                   |                |
| 85 and Older                                   | 29,353 (17.99)                       | 5,245 (17.99)                                   |                |
| <b>Gender</b>                                  |                                      |                                                 |                |
| Female                                         | 95,234 (58.36)                       | 17,014 (58.35)                                  | .97            |
| Male                                           | 67,960 (41.64)                       | 12,147 (41.65)                                  |                |
| <b>Dual Medicare-Medicaid Eligibility Flag</b> |                                      |                                                 |                |
| No                                             | 153,306 (93.94)                      | 27,392 (93.93)                                  | .96            |
| Yes                                            | 9,888 (6.06)                         | 1,769 (6.07)                                    |                |
| <b>COVID-19 Vulnerability Index Score</b>      |                                      |                                                 |                |
| 1 or 2                                         | 25,214 (15.45)                       | 4,502 (15.44)                                   | >.99           |
| 3                                              | 50,841 (31.15)                       | 9,080 (31.14)                                   |                |
| 4                                              | 51,879 (31.79)                       | 9,274 (31.8)                                    |                |
| 5                                              | 35,260 (21.61)                       | 6,305 (21.62)                                   |                |
| <b>County</b>                                  |                                      |                                                 |                |
| Anne Arundel                                   | 18,465 (11.31)                       | 3,297 (11.31)                                   |                |
| Baltimore                                      | 27,030 (16.56)                       | 4,828 (16.56)                                   |                |
| Baltimore City                                 | 7,310 (4.48)                         | 1,306 (4.48)                                    |                |
| Calvert                                        | 4,343 (2.66)                         | 776 (2.66)                                      |                |
| Carroll                                        | 9,398 (5.76)                         | 1,680 (5.76)                                    |                |
| Charles                                        | 2,765 (1.69)                         | 493 (1.69)                                      |                |
| Frederick                                      | 10,808 (6.62)                        | 1,932 (6.63)                                    |                |
| Harford                                        | 11,231 (6.88)                        | 2,006 (6.88)                                    |                |
| Howard                                         | 9,843 (6.03)                         | 1,759 (6.03)                                    |                |
| Montgomery                                     | 18,624 (11.41)                       | 3,325 (11.4)                                    |                |
| Other                                          | 18,399 (11.27)                       | 3,295 (11.3)                                    |                |
| Prince Georges                                 | 5,097 (3.12)                         | 911 (3.12)                                      |                |

|                          |              |              |       |
|--------------------------|--------------|--------------|-------|
| Saint Marys              | 4,646 (2.85) | 830 (2.85)   |       |
| Washington               | 7,671 (4.7)  | 1,369 (4.69) |       |
| Wicomico                 | 3,907 (2.39) | 700 (2.4)    |       |
| Worcester                | 3,657 (2.24) | 654 (2.24)   |       |
| <b>Average HCC Score</b> |              |              |       |
|                          | 1.3383       | 1.3719       | <.001 |
| <b>Average ADI Score</b> |              |              |       |
|                          | 29.18        | 28.59        | <.001 |



**eTable 19.** Comparison of Uptake of COVID-19 Primary Outcomes Between the Matched MDPCP Group and Nonparticipating Group, for White Race Beneficiaries Only

|                                                                          | <b>MDPCP Group (n = 163,194)</b> | <b>Non-Participating Group (n = 29,161)</b> |                |
|--------------------------------------------------------------------------|----------------------------------|---------------------------------------------|----------------|
| <b>Measures</b>                                                          | <b>n (%)</b>                     | <b>n (%)</b>                                | <b>p-value</b> |
| <b>Vaccine Status</b>                                                    |                                  |                                             |                |
| NOT vaccinated                                                           | 21,288 (13.04)                   | 5,417 (18.58)                               | <.001          |
| fully vaccinated with booster                                            | 107,778 (66.04)                  | 17,139 (58.77)                              |                |
| fully vaccinated without booster                                         | 30,479 (18.68)                   | 5,662 (19.42)                               |                |
| partially vaccinated                                                     | 3,649 (2.24)                     | 943 (3.23)                                  |                |
| <b>Booster Vaccine Status</b>                                            |                                  |                                             |                |
| No                                                                       | 55,416 (33.96)                   | 12,022 (41.23)                              | <.001          |
| Yes                                                                      | 107,778 (66.04)                  | 17,139 (58.77)                              |                |
| <b>COVID-19 positive beneficiaries with monoclonal antibody infusion</b> | 974 (9.52)                       | 144 (7.13)                                  | <.001          |
| <b>COVID-19 positive beneficiaries with telehealth service claims</b>    | 15,691 (61.76)                   | 2,864 (54.06)                               | <.001          |

**eTable 20.** COVID-19 Secondary Outcomes in the Matched MDPCP Group and Nonparticipating Group, for White Race Beneficiaries Only

|                                                         | <b>MDPCP Group<br/>(n = 163,194)</b> | <b>Non-Participating<br/>Group (n = 29,161)</b> |                |
|---------------------------------------------------------|--------------------------------------|-------------------------------------------------|----------------|
| <b>Measures</b>                                         | <b>n (%)</b>                         | <b>n (%)</b>                                    | <b>p-value</b> |
| COVID-19 Positive Beneficiaries                         | 10,235 (6.27)                        | 2,020 (6.93)                                    | <.001          |
| Beneficiaries with COVID-19 inpatient claims            | 2,638 (1.62)                         | 554 (1.9)                                       | <.001          |
| Beneficiaries with COVID-19 emergency department claims | 1,480 (0.91)                         | 305 (1.05)                                      | .02            |
| COVID-19 Death Count                                    | 844 (0.52)                           | 220 (0.75)                                      | <.001          |
| Average COVID-19 inpatient admission length of stay     | 9.45                                 | 9.69                                            | .51            |
